# Supplementary material for: Isomerization of surface functionalized SWCNTs and the critical influence on photoluminescence: static calculations and excited-state dynamics simulations
Source: Royal Society of Chemistry journal article supplement (doi:10.1039/d3cp05115c), 2024-01-01
Supplement: d3cp05115c1.pdf [file d3cp05115c1.pdf]

## Supporting Information:

### Isomerization of Surface Functionalized SWCNTs and the Critical Influence on Photoluminescence: Static Calculations and Excited-State Dynamics Simulations

Shunwei Chen\*, Yi Li, Xinxin Chen, Lingyun Li, Qifang Lu, Enyan Guo, Conghui Si, Mingzhi Wei, Xiujun Han\*

School of Materials Science and Engineering, Qilu University of Technology (Shandong Academy of Sciences), Jinan 250353, China

\*Corresponding author. E-mail: swchen@qlu.edu.cn (S.W. Chen), xjhan@qlu.edu.cn (X.J. Han)

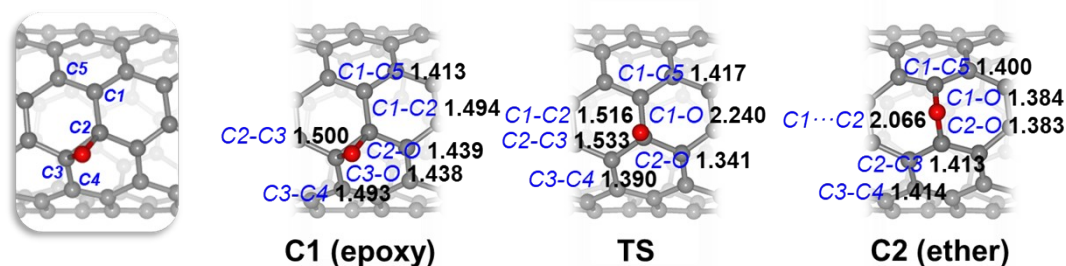

Fig. S1. Structural parameters of the studied reaction path for oxygen functionalized SWCNT fragment (bond lengths in Å).

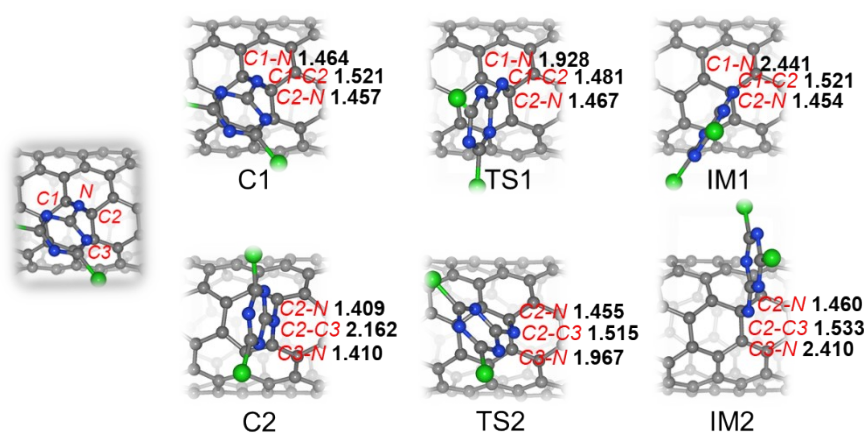

Fig. S2. Key structural parameters of the studied reaction paths for triazine group functionalized SWCNT fragment (bond lengths in Å).

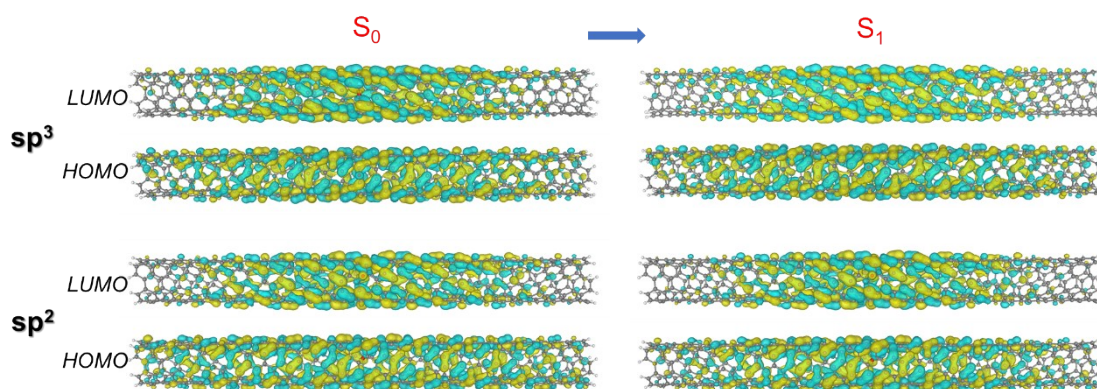

Fig. S3. HOMO-LUMO spatial distributions of oxygen functionalized SWCNT fragment in the relaxed  $S_0$  and  $S_1$  state. The structural model contains 751 atoms with a length of  $\sim 8$  nm.

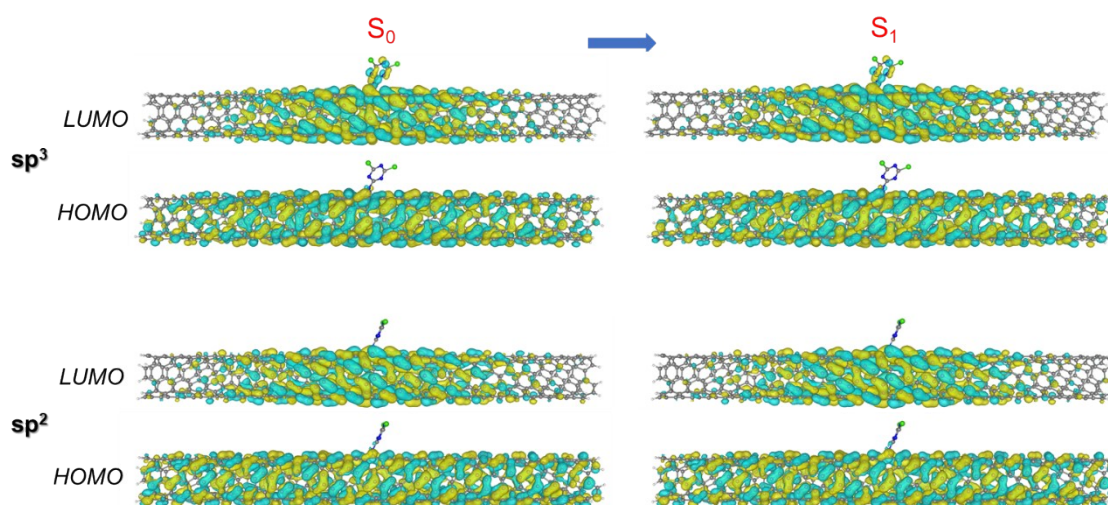

Fig. S4. HOMO-LUMO spatial distributions of triazine group functionalized SWCNT fragment in the relaxed  $S_0$  and  $S_1$  state. The structural model contains 759 atoms with a length of  $\sim 8$  nm.

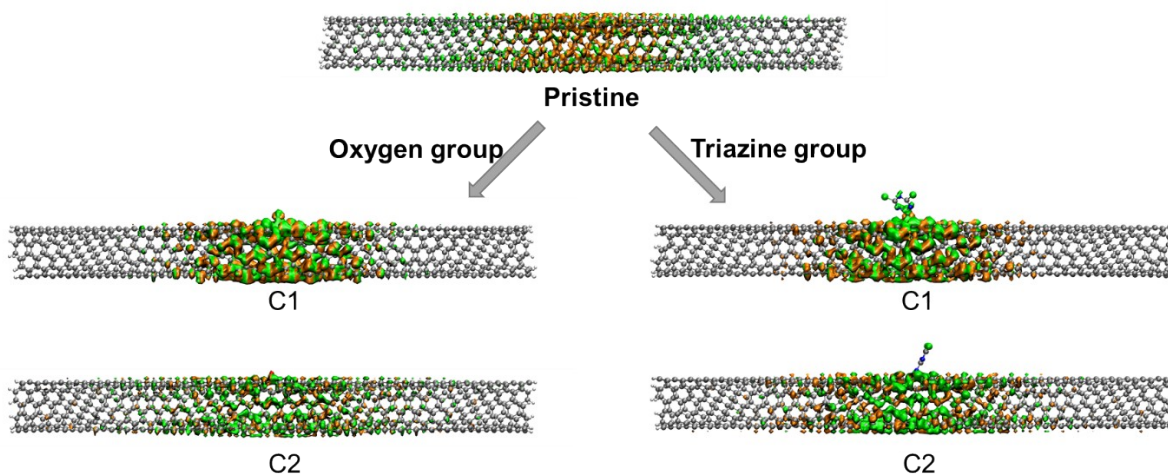

Fig. S5. Electron-hole distribution of the oxygen and triazine group functionalized SWCNT fragments in the relaxed  $S_1$  state. The orange nodes represent the spatial distribution of the photogenerated hole, whereas the green ones denote the electron.

Table S1. Atomic coordinates (XYZ form) of the  $sp^3$  configuration of oxidized SWCNT fragment.

|   |             |             |             |   |            |             |             |
|---|-------------|-------------|-------------|---|------------|-------------|-------------|
| C | -9.08872400 | 1.91914200  | -2.80114400 | C | 1.30435300 | -3.26133600 | -1.25055100 |
| C | -8.94625900 | 2.87847900  | -1.84141200 | C | 1.63258900 | 1.19068800  | 3.15537200  |
| C | -9.06663000 | -2.05096600 | 2.80264200  | C | 1.79409000 | -0.18969400 | 3.39485700  |
| C | -8.91741900 | -3.01410500 | 1.84434300  | C | 1.63496300 | -1.26045500 | -3.16937100 |
| C | -8.59046700 | 3.34283400  | 1.06663500  | C | 1.79404200 | 0.12636600  | -3.38618500 |
| C | -8.41727100 | 2.77134700  | 2.30612500  | C | 2.12251200 | -2.69854200 | 2.21653600  |
| C | -8.55966400 | -3.48307800 | -1.05748000 | C | 2.28566400 | -3.37604000 | 0.98064900  |
| C | -8.39855600 | -2.90205100 | -2.29362400 | C | 2.13735100 | 2.64098900  | -2.21935500 |
| C | -8.08060300 | 0.11094300  | 3.49891100  | C | 2.31679700 | 3.31404200  | -0.97601300 |
| C | -7.94183100 | -1.27072100 | 3.21150800  | C | 2.61747700 | -3.00555700 | -1.76258600 |
| C | -8.08838400 | -0.23546300 | -3.49127200 | C | 2.77759800 | -2.01999200 | -2.78834600 |
| C | -7.95669600 | 1.14172800  | -3.20699400 | C | 2.62645800 | 2.93493300  | 1.75824600  |
| C | -7.63744700 | -3.27914100 | 1.26906800  | C | 2.78068900 | 1.95147000  | 2.79109700  |
| C | -7.47043500 | -3.55560800 | -0.15206300 | C | 3.09737500 | 0.69794100  | -3.35258300 |
| C | -7.66575400 | 3.14857600  | -1.26267600 | C | 3.25626400 | 2.02190200  | -2.79334600 |
| C | -7.50418400 | 3.42224900  | 0.15959600  | C | 3.09451600 | -0.76521800 | 3.35553900  |
| C | -7.14062900 | -2.39068100 | -2.69352800 | C | 3.25501800 | -2.08390900 | 2.79893000  |
| C | -6.99602900 | -1.08509600 | -3.36400100 | C | 3.60402100 | 3.42149100  | -0.41610900 |
| C | -7.15290800 | 2.27718600  | 2.70683200  | C | 3.75597100 | 3.27903900  | 0.99858300  |
| C | -6.99879800 | 0.96690100  | 3.37663900  | C | 3.57969300 | -3.50185500 | 0.42461000  |
| C | -6.67522800 | 1.66737500  | -2.93726700 | C | 3.74070300 | -3.36022100 | -0.99844600 |
| C | -6.53514100 | 2.71462300  | -1.97074700 | C | 4.06555300 | 1.44795600  | 3.07262800  |
| C | -6.65914500 | -1.78482500 | 2.93918600  | C | 4.22331700 | 0.07068300  | 3.40515300  |
| C | -6.50851900 | -2.83363600 | 1.97686000  | C | 4.06526100 | -1.51706100 | -3.06576400 |
| C | -6.21497300 | 3.32612000  | 0.71765000  | C | 4.22230800 | -0.13738300 | -3.40022800 |
| C | -6.03521300 | 2.77273100  | 2.02095900  | C | 4.54852400 | -2.51515400 | 2.42145800  |
| C | -6.18141200 | -3.44605900 | -0.70948500 | C | 4.71017700 | -3.27435700 | 1.24008500  |
| C | -6.01519900 | -2.88240600 | -2.01195900 | C | 4.56488100 | 2.44172500  | -2.41203800 |
| C | -5.68427700 | 0.39743500  | 3.41449900  | C | 4.73770900 | 3.19036500  | -1.23600400 |
| C | -5.51888500 | -0.99828100 | 3.27010500  | C | 5.04455200 | -3.11558200 | -1.51494500 |
| C | -5.68913200 | -0.50469900 | -3.40705400 | C | 5.20650500 | -2.22925000 | -2.59312800 |
| C | -5.52945800 | 0.89163600  | -3.26378400 | C | 5.06448100 | 3.03534600  | 1.52106400  |
| C | -5.19165500 | -3.12595800 | 1.49235500  | C | 5.21810900 | 2.15584600  | 2.59991300  |
| C | -5.02694200 | -3.49426000 | 0.14213700  | C | 5.54558700 | 0.43149900  | -3.36757300 |
| C | -5.21938500 | 3.01201100  | -1.48190100 | C | 5.71859300 | 1.76639000  | -2.93573100 |
| C | -5.06438500 | 3.38021800  | -0.13476400 | C | 5.53927300 | -0.50622000 | 3.37049500  |
| C | -4.69084300 | -2.50645300 | -2.43582700 | C | 5.70554600 | -1.84130500 | 2.93831100  |
| C | -4.53219400 | -1.32254900 | -3.20682900 | C | 6.05900100 | 3.36212700  | -0.69260800 |
| C | -4.69688700 | 2.41603800  | 2.44407200  | C | 6.21812000 | 3.34458200  | 0.73283500  |
| C | -4.53381500 | 1.22274800  | 3.22387700  | C | 6.03381700 | -3.44482600 | 0.69822900  |
| C | -4.22251400 | 1.44314100  | -3.06715300 | C | 6.19720900 | -3.42623900 | -0.72440400 |
| C | -4.07500900 | 2.57775500  | -2.19895600 | C | 6.52742800 | 1.69512700  | 2.93998400  |
| C | -4.21401300 | -1.54324300 | 3.08135300  | C | 6.67485800 | 0.33993800  | 3.39331200  |
| C | -4.05666100 | -2.68089400 | 2.21775700  | C | 6.52004400 | -1.77575200 | -2.93065500 |
| C | -3.76920800 | 3.42508400  | 0.43048000  | C | 6.67352600 | -0.42047200 | -3.38580700 |

|   |             |             |             |   |              |             |             |
|---|-------------|-------------|-------------|---|--------------|-------------|-------------|
| C | -3.59051400 | 2.95962600  | 1.79967500  | C | 7.00939900   | -2.34395900 | 2.65713200  |
| C | -3.72987500 | -3.50295200 | -0.42478000 | C | 7.15764300   | -3.25949700 | 1.51581700  |
| C | -3.56699100 | -3.03889300 | -1.78157200 | C | 7.02427900   | 2.25936500  | -2.64933200 |
| C | -3.25010400 | 0.67206500  | 3.36101700  | C | 7.18025400   | 3.16876300  | -1.50804500 |
| C | -3.08815800 | -0.75217300 | 3.35590200  | C | 7.48494900   | -3.28726700 | -1.27870500 |
| C | -3.24467100 | -0.76394500 | -3.35726000 | C | 7.64634300   | -2.46794300 | -2.46167000 |
| C | -3.09004000 | 0.66379900  | -3.33256500 | C | 7.50417700   | 3.19744100  | 1.28702100  |
| C | -2.76754200 | -3.01866000 | 1.75746200  | C | 7.66009100   | 2.37975600  | 2.46804300  |
| C | -2.60387500 | -3.48756600 | 0.42201200  | C | 7.96676900   | 0.15497900  | -3.41089700 |
| C | -2.79277300 | 2.93702200  | -1.72963900 | C | 8.11662000   | 1.51529100  | -3.10762600 |
| C | -2.66292200 | 3.42405400  | -0.41178800 | C | 7.96174700   | -0.24381500 | 3.42105500  |
| C | -2.26742600 | -2.68488200 | -2.22669500 | C | 8.10312500   | -1.60786000 | 3.11656900  |
| C | -2.10525800 | -1.55971100 | -3.06989800 | C | 8.45033300   | 3.45905500  | -0.93043000 |
| C | -2.26897900 | 2.59976800  | 2.21520300  | C | 8.60711900   | 3.48988000  | 0.42815700  |
| C | -2.10534800 | 1.47137300  | 3.05205300  | C | 8.42316000   | -3.55463900 | 0.93979300  |
| C | -1.78270600 | 1.21906900  | -3.14003600 | C | 8.58282900   | -3.58483900 | -0.42110800 |
| C | -1.62088600 | 2.41297700  | -2.39551700 | C | 8.94668000   | 1.90583900  | 2.90279600  |
| C | -1.78004700 | -1.30106700 | 3.18268800  | C | 9.09342500   | 0.64331100  | 3.38427900  |
| C | -1.61996400 | -2.48690400 | 2.42690700  | C | 8.93675800   | -2.00259000 | -2.89565000 |
| C | -1.32372900 | 3.66962200  | 0.17211200  | C | 9.09250200   | -0.74095400 | -3.37563600 |
| C | -1.12974600 | 3.14320100  | 1.55569900  | H | -10.07953700 | 1.63680000  | -3.14659000 |
| C | -1.28755000 | -3.51356400 | -0.14607300 | H | -9.83289000  | 3.35508600  | -1.43540200 |
| C | -1.12244000 | -3.16036700 | -1.51363700 | H | -10.06070400 | -1.77078000 | 3.14050900  |
| C | -0.80355700 | 0.94199500  | 3.26163900  | H | -9.80261700  | -3.49035700 | 1.43503700  |
| C | -0.64124600 | -0.48097000 | 3.40118100  | H | -9.59912100  | 3.57104100  | 0.73818200  |
| C | -0.79689900 | -1.02037400 | -3.27337900 | H | -9.29658000  | 2.56834800  | 2.90966600  |
| C | -0.64064100 | 0.40295100  | -3.36547100 | H | -9.56456500  | -3.72386500 | -0.72654000 |
| C | -0.32128200 | -2.87586000 | 2.00684500  | H | -9.28214900  | -2.70602600 | -2.89315500 |
| C | -0.15898600 | -3.45907300 | 0.70067900  | H | -9.09075500  | 0.50824900  | 3.50910700  |
| C | -0.32603900 | 2.84610800  | -2.03025700 | H | -9.09517700  | -0.64103500 | -3.50568600 |
| C | -0.14290400 | 3.59412600  | -0.74985500 | H | 9.12666400   | 1.88491200  | -2.96097100 |
| C | 0.16972500  | -2.86370800 | -2.00191900 | H | 9.11159000   | -1.98139000 | 2.96895000  |
| C | 0.32891700  | -1.79235000 | -2.94517300 | H | 9.33044400   | 3.53304300  | -1.56168800 |
| C | 0.14400900  | 2.79369900  | 1.98856000  | H | 9.60702400   | 3.58578500  | 0.83820200  |
| C | 0.31916800  | 1.71533000  | 2.91421800  | H | 9.30411200   | -3.62475900 | 1.57038000  |
| C | 0.64538700  | 0.96604600  | -3.24330000 | H | 9.58437200   | -3.67754200 | -0.82783600 |
| C | 0.79765700  | 2.22532400  | -2.58846200 | H | 9.82697500   | 2.52159500  | 2.74792000  |
| C | 0.64529000  | -1.03838900 | 3.27553500  | H | 10.08257600  | 0.25079300  | 3.60328100  |
| C | 0.80742500  | -2.29044500 | 2.61724400  | H | 9.81220700   | -2.62586700 | -2.74322400 |
| C | 1.18717500  | 3.43819600  | -0.12734600 | H | 10.08413400  | -0.35533600 | -3.59563800 |
| C | 1.32218700  | 3.18593000  | 1.22462500  | O | -0.73690100  | 4.85043200  | -0.39150700 |
| C | 1.13908400  | -3.51125900 | 0.13328000  |   |              |             |             |

Table S2. Atomic coordinates (XYZ form) of the transition state for oxygen migration on the surface of the SWCNT fragment.

|   |             |             |             |   |            |             |             |
|---|-------------|-------------|-------------|---|------------|-------------|-------------|
| C | -9.09712200 | 2.22542100  | -2.56163800 | C | 1.30630800 | -3.13786400 | -1.56025100 |
| C | -8.95110000 | 3.08085900  | -1.51961600 | C | 1.64399900 | 0.87506600  | 3.25765200  |
| C | -9.10227800 | -2.33184400 | 2.56974300  | C | 1.79999000 | -0.53228000 | 3.36320000  |
| C | -8.95008800 | -3.19182100 | 1.53179500  | C | 1.63617600 | -0.95945200 | -3.26880800 |
| C | -8.60270800 | 3.22734600  | 1.41253400  | C | 1.79479800 | 0.44754800  | -3.33701300 |
| C | -8.44078000 | 2.52613900  | 2.57072700  | C | 2.12013100 | -2.91568900 | 1.94885300  |
| C | -8.58876500 | -3.33935400 | -1.39761200 | C | 2.28055300 | -3.47579500 | 0.64590100  |
| C | -8.42674000 | -2.63572700 | -2.55613800 | C | 2.12961900 | 2.84048800  | -1.90937300 |
| C | -8.11333800 | -0.24743900 | 3.45136300  | C | 2.30414200 | 3.45109000  | -0.61726800 |
| C | -7.97178200 | -1.57465400 | 3.04652100  | C | 2.61128200 | -2.83550200 | -2.04500700 |
| C | -8.10143000 | 0.14229900  | -3.43548400 | C | 2.77250300 | -1.75002100 | -2.96681400 |
| C | -7.96077300 | 1.47414400  | -3.03444500 | C | 2.62489900 | 2.75025800  | 2.04406300  |
| C | -7.65609200 | -3.37598300 | 0.92186100  | C | 2.77947900 | 1.65800500  | 2.96030000  |
| C | -7.48998800 | -3.51128900 | -0.49691500 | C | 3.08803100 | 1.01440700  | -3.21912200 |
| C | -7.65904700 | 3.27012300  | -0.90703900 | C | 3.24287500 | 2.27869000  | -2.53798400 |
| C | -7.49952300 | 3.40241200  | 0.51470300  | C | 3.09335300 | -1.10185900 | 3.25403200  |
| C | -7.15395100 | -2.07767700 | -2.88730600 | C | 3.25138700 | -2.35285000 | 2.57790100  |
| C | -7.00124200 | -0.72721500 | -3.41813400 | C | 3.59523300 | 3.46333500  | -0.05366000 |
| C | -7.16369300 | 1.97565000  | 2.90813000  | C | 3.75820100 | 3.17831900  | 1.33029400  |
| C | -7.01039900 | 0.62468200  | 3.43895000  | C | 3.57481000 | -3.53153700 | 0.07716800  |
| C | -6.67017100 | 1.96731100  | -2.72333300 | C | 3.73780800 | -3.25951200 | -1.31176000 |
| C | -6.52237200 | 2.92891300  | -1.66721100 | C | 4.07661900 | 1.11896300  | 3.18146600  |
| C | -6.67654500 | -2.06819100 | 2.74222600  | C | 4.23354700 | -0.26800700 | 3.38242000  |
| C | -6.52265900 | -3.02530000 | 1.68619300  | C | 4.06394800 | -1.20917300 | -3.17171100 |
| C | -6.21002000 | 3.26014800  | 1.06289700  | C | 4.22076800 | 0.18699800  | -3.35895200 |
| C | -6.04107800 | 2.56133300  | 2.30681500  | C | 4.55595300 | -2.74721400 | 2.15554300  |
| C | -6.19630500 | -3.36294900 | -1.04342600 | C | 4.71593800 | -3.39278800 | 0.91913700  |
| C | -6.02892200 | -2.66420700 | -2.28423200 | C | 4.56283400 | 2.66165600  | -2.12603200 |
| C | -5.71126700 | 0.05186000  | 3.44134500  | C | 4.73699800 | 3.30345100  | -0.89745200 |
| C | -5.54637300 | -1.32704100 | 3.15443600  | C | 5.04914800 | -2.96566300 | -1.80361300 |
| C | -5.69933800 | -0.15202500 | -3.41432500 | C | 5.21028000 | -1.97394700 | -2.78419500 |
| C | -5.53371000 | 1.22470100  | -3.12386100 | C | 5.07227400 | 2.87530500  | 1.82243700  |
| C | -5.21609600 | -3.26256100 | 1.17352800  | C | 5.22900000 | 1.88372800  | 2.80183700  |
| C | -5.05143000 | -3.49265200 | -0.20453900 | C | 5.54466800 | 0.75417800  | -3.27971300 |
| C | -5.21906300 | 3.16897800  | -1.14855500 | C | 5.71523200 | 2.04648100  | -2.72261400 |
| C | -5.06443500 | 3.39208400  | 0.22437700  | C | 5.54939400 | -0.84368200 | 3.30205600  |
| C | -4.71174900 | -2.23777500 | -2.65900200 | C | 5.71295600 | -2.13692500 | 2.74461400  |
| C | -4.54866100 | -0.99316800 | -3.30036500 | C | 6.05686900 | 3.42685400  | -0.34510600 |
| C | -4.72098300 | 2.13125900  | 2.67379800  | C | 6.22132200 | 3.26459200  | 1.07488000  |
| C | -4.55751600 | 0.89273400  | 3.31270900  | C | 6.03468000 | -3.52092900 | 0.36387000  |
| C | -4.22111500 | 1.73899300  | -2.85768200 | C | 6.19765700 | -3.35814800 | -1.05368200 |
| C | -4.05921400 | 2.79239400  | -1.91065300 | C | 6.53324200 | 1.38813900  | 3.09016000  |
| C | -4.23325400 | -1.84098300 | 2.88987200  | C | 6.68116600 | -0.00645100 | 3.40083500  |
| C | -4.07363300 | -2.87265800 | 1.93941100  | C | 6.51753700 | -1.48440600 | -3.07299400 |

|   |             |             |             |   |              |             |             |
|---|-------------|-------------|-------------|---|--------------|-------------|-------------|
| C | -3.75042200 | 3.34281000  | 0.79045600  | C | 6.66931600   | -0.08768500 | -3.38578300 |
| C | -3.58110600 | 2.75022100  | 2.07605600  | C | 7.01243200   | -2.60681900 | 2.40849800  |
| C | -3.74161800 | -3.42073000 | -0.77009300 | C | 7.15842900   | -3.40564000 | 1.19375800  |
| C | -3.57532700 | -2.84699500 | -2.05994100 | C | 7.01819900   | 2.50640100  | -2.38848400 |
| C | -3.25155600 | 0.32731000  | 3.40687300  | C | 7.17543700   | 3.30279600  | -1.17552000 |
| C | -3.09110500 | -1.08237900 | 3.26897500  | C | 7.48643900   | -3.14933300 | -1.58820700 |
| C | -3.24813400 | -0.42618600 | -3.39002800 | C | 7.64650200   | -2.21984700 | -2.67364600 |
| C | -3.08813300 | 0.98403000  | -3.22895700 | C | 7.51077800   | 3.04604300  | 1.60400400  |
| C | -2.77243200 | -3.17408700 | 1.45132200  | C | 7.66854800   | 2.11698700  | 2.68552000  |
| C | -2.60862200 | -3.51906500 | 0.07711900  | C | 7.96678500   | 0.48873700  | -3.34716800 |
| C | -2.77918500 | 3.10493900  | -1.42572600 | C | 8.11732900   | 1.80657000  | -2.92017300 |
| C | -2.62538100 | 3.49199900  | -0.04079100 | C | 7.97381700   | -0.59232300 | 3.36305300  |
| C | -2.27422100 | -2.46384800 | -2.47952600 | C | 8.11491600   | -1.91345300 | 2.93693400  |
| C | -2.11129200 | -1.25558100 | -3.21298400 | C | 8.45442000   | 3.53459800  | -0.57383200 |
| C | -2.28599300 | 2.36304800  | 2.46890100  | C | 8.61710800   | 3.43183300  | 0.77502100  |
| C | -2.11872200 | 1.15364200  | 3.20594000  | C | 8.43049800   | -3.64304000 | 0.58820100  |
| C | -1.78720400 | 1.50879300  | -2.98480900 | C | 8.59005700   | -3.53880700 | -0.76340100 |
| C | -1.62502700 | 2.61474700  | -2.11489800 | C | 8.95901100   | 1.60046500  | 3.07466700  |
| C | -1.79608500 | -1.61220200 | 3.04722200  | C | 9.10700500   | 0.29953700  | 3.42603000  |
| C | -1.63601400 | -2.72221000 | 2.16980700  | C | 8.94045500   | -1.71196300 | -3.06618000 |
| C | -1.32761600 | 3.46767000  | 0.51984900  | C | 9.09439000   | -0.41167000 | -3.41495300 |
| C | -1.15440000 | 2.90787700  | 1.77995400  | H | -10.08360200 | 2.00152900  | -2.95769100 |
| C | -1.30524900 | -3.48726300 | -0.49205900 | H | -9.82699400  | 3.54797100  | -1.08151600 |
| C | -1.13863500 | -3.00724200 | -1.81917300 | H | -10.09166100 | -2.11005100 | 2.95982700  |
| C | -0.81628100 | 0.59683900  | 3.32028300  | H | -9.82339400  | -3.66216900 | 1.09211500  |
| C | -0.65479800 | -0.80150200 | 3.31232200  | H | -9.60161100  | 3.53031700  | 1.11640800  |
| C | -0.80782500 | -0.69291900 | -3.34024400 | H | -9.31203600  | 2.28725200  | 3.17215700  |
| C | -0.64889800 | 0.71761500  | -3.29998100 | H | -9.58873500  | -3.63967500 | -1.10247200 |
| C | -0.33338800 | -3.04661100 | 1.69312900  | H | -9.29903700  | -2.39416100 | -3.15484200 |
| C | -0.16933100 | -3.50159400 | 0.36492500  | H | -9.11991900  | 0.15311800  | 3.52019100  |
| C | -0.32834300 | 2.94143600  | -1.64573800 | H | -9.10854300  | -0.25756000 | -3.50183000 |
| C | -0.17454600 | 3.82816400  | -0.42338700 | H | 9.12615300   | 2.16647000  | -2.74495700 |
| C | 0.16442000  | -2.64412200 | -2.26314900 | H | 9.12168400   | -2.27745600 | 2.75855400  |
| C | 0.32814800  | -1.50995200 | -3.09410200 | H | 9.32730300   | 3.68867000  | -1.20069900 |
| C | 0.16883300  | 2.53735600  | 2.22280500  | H | 9.61513600   | 3.50085400  | 1.19459700  |
| C | 0.33085100  | 1.41986700  | 3.03772800  | H | 9.30717400   | -3.79085800 | 1.21115100  |
| C | 0.64594400  | 1.26437300  | -3.09148400 | H | 9.58839200   | -3.60357100 | -1.18282500 |
| C | 0.80109600  | 2.43421300  | -2.31034400 | H | 9.83579100   | 2.23569000  | 2.99769100  |
| C | 0.65438400  | -1.35380100 | 3.13204200  | H | 10.09395800  | -0.11181000 | 3.61828100  |
| C | 0.81273200  | -2.52930600 | 2.37623400  | H | 9.81271700   | -2.35415500 | -2.99581400 |
| C | 1.17150900  | 3.51288300  | 0.22907000  | H | 10.08295300  | -0.00635000 | -3.61196400 |
| C | 1.32507000  | 3.06726100  | 1.53918500  | O | -0.23933500  | 5.06005800  | -0.93685900 |
| C | 1.14099800  | -3.51210100 | -0.20762500 |   |              |             |             |

Table S3. Atomic coordinates (XYZ form) of the sp<sup>2</sup> configuration of oxidized SWCNT fragment.

|   |             |             |             |   |            |             |             |
|---|-------------|-------------|-------------|---|------------|-------------|-------------|
| C | -9.12256700 | 2.73347700  | -2.01459500 | C | 1.31314800 | -2.75781200 | -2.14016200 |
| C | -8.96743400 | 3.36672400  | -0.83112600 | C | 1.64325400 | 0.14428500  | 3.36224600  |
| C | -9.11307800 | -2.82869800 | 2.04528000  | C | 1.80469700 | -1.26471700 | 3.19328800  |
| C | -8.96252600 | -3.46118900 | 0.86134100  | C | 1.63168000 | -0.25594100 | -3.32343100 |
| C | -8.59114500 | 2.90290400  | 2.06844200  | C | 1.78717500 | 1.14254900  | -3.11656500 |
| C | -8.42307600 | 1.96262900  | 3.03175900  | C | 2.12604600 | -3.30927500 | 1.33067500  |
| C | -8.60681400 | -2.99726800 | -2.03802600 | C | 2.28624300 | -3.57589400 | -0.06771100 |
| C | -8.44469400 | -2.05727700 | -3.00152200 | C | 2.10412400 | 3.29013700  | -1.32230500 |
| C | -8.11698500 | -0.94589200 | 3.30243000  | C | 2.27565700 | 3.56554000  | 0.08288100  |
| C | -7.97787400 | -2.15378600 | 2.64705900  | C | 2.60737900 | -2.34879100 | -2.54380600 |
| C | -8.13244000 | 0.84936500  | -3.27470500 | C | 2.76474300 | -1.08559800 | -3.19398700 |
| C | -7.99050400 | 2.05631500  | -2.61930800 | C | 2.61874200 | 2.21183000  | 2.52396600  |
| C | -7.66335600 | -3.51611700 | 0.21610100  | C | 2.77780800 | 0.96949600  | 3.19784400  |
| C | -7.49824100 | -3.34414300 | -1.17849600 | C | 3.07650600 | 1.68301300  | -2.90477000 |
| C | -7.66596200 | 3.42337600  | -0.19210900 | C | 3.23536800 | 2.79019500  | -2.02094400 |
| C | -7.49031200 | 3.24867400  | 1.20086200  | C | 3.10035500 | -1.78743800 | 2.95968200  |
| C | -7.16050200 | -1.43348900 | -3.20710700 | C | 3.26142900 | -2.86759300 | 2.05268900  |
| C | -7.01444300 | -0.01829000 | -3.42507100 | C | 3.57605800 | 3.41801100  | 0.64228200  |
| C | -7.14066700 | 1.33480400  | 3.22524600  | C | 3.74735800 | 2.80880500  | 1.90787900  |
| C | -6.99792600 | -0.08058900 | 3.44876900  | C | 3.58368200 | -3.49022300 | -0.63587900 |
| C | -6.68639500 | 2.50108600  | -2.23608400 | C | 3.74502600 | -2.91545600 | -1.91321900 |
| C | -6.53055500 | 3.24357800  | -1.02502600 | C | 4.08430000 | 0.40986300  | 3.31069000  |
| C | -6.67567400 | -2.60085800 | 2.26136400  | C | 4.24749800 | -0.98168300 | 3.24442700  |
| C | -6.52342900 | -3.33735400 | 1.04266400  | C | 4.06409600 | -0.51094300 | -3.29350000 |
| C | -6.18578100 | 3.00344600  | 1.70597300  | C | 4.22046500 | 0.88258500  | -3.20474800 |
| C | -6.01443900 | 2.04076400  | 2.75990700  | C | 4.57560400 | -3.16747000 | 1.55965500  |
| C | -6.19830300 | -3.10453900 | -1.69521800 | C | 4.73515500 | -3.53821400 | 0.21913800  |
| C | -6.03292200 | -2.14820900 | -2.75972400 | C | 4.55518000 | 3.08535600  | -1.54581500 |
| C | -5.70282700 | -0.65482500 | 3.35026900  | C | 4.72524100 | 3.46080000  | -0.20993000 |
| C | -5.54551600 | -1.96513800 | 2.80876400  | C | 5.05913500 | -2.52673500 | -2.34390800 |
| C | -5.71699800 | 0.55135000  | -3.32657900 | C | 5.21453900 | -1.34459400 | -3.09147600 |
| C | -5.55529500 | 1.85986400  | -2.77821100 | C | 5.06171000 | 2.42878600  | 2.33857500  |
| C | -5.22475900 | -3.47997800 | 0.49329000  | C | 5.22574400 | 1.24930600  | 3.09166100  |
| C | -5.06095600 | -3.40880200 | -0.90612800 | C | 5.53715000 | 1.42951700  | -3.03954900 |
| C | -5.22901900 | 3.39834100  | -0.48405400 | C | 5.70537600 | 2.59708600  | -2.24692100 |
| C | -5.05386200 | 3.32130100  | 0.91231300  | C | 5.56275900 | -1.52301400 | 3.05986900  |
| C | -4.72577700 | -1.64405000 | -3.02011900 | C | 5.72963100 | -2.68736800 | 2.25803900  |
| C | -4.56799100 | -0.29460600 | -3.36065900 | C | 6.03881400 | 3.46015400  | 0.35731100  |
| C | -4.70440400 | 1.53067600  | 3.00148100  | C | 6.20503900 | 2.98095800  | 1.70300800  |
| C | -4.54846800 | 0.18497500  | 3.36628100  | C | 6.04526200 | -3.54400400 | -0.35433500 |
| C | -4.24840100 | 2.31855600  | -2.41781000 | C | 6.20486900 | -3.06947600 | -1.70482700 |
| C | -4.08287800 | 3.16197000  | -1.30829900 | C | 6.52906200 | 0.71624300  | 3.27217900  |
| C | -4.23651800 | -2.42800700 | 2.45030100  | C | 6.68682800 | -0.70845100 | 3.30296800  |
| C | -4.07706100 | -3.23905000 | 1.31964300  | C | 6.51329500 | -0.80330000 | -3.27382200 |
| C | -3.72847400 | 3.12331900  | 1.42524500  | C | 6.66341700 | 0.62287700  | -3.29960300 |

|   |             |             |             |   |              |             |             |
|---|-------------|-------------|-------------|---|--------------|-------------|-------------|
| C | -3.56008000 | 2.24209500  | 2.50716400  | C | 7.02756800   | -3.06020900 | 1.82130700  |
| C | -3.74107700 | -3.21201400 | -1.43967300 | C | 7.17378000   | -3.58573600 | 0.48032900  |
| C | -3.57470600 | -2.36202200 | -2.54301800 | C | 7.00607300   | 2.97817300  | -1.82374200 |
| C | -3.23986200 | -0.40338000 | 3.35673000  | C | 7.16143400   | 3.50645600  | -0.48358300 |
| C | -3.08335000 | -1.75152800 | 2.96402500  | C | 7.49727900   | -2.73619800 | -2.17615500 |
| C | -3.25499700 | 0.28460300  | -3.33292100 | C | 7.65292300   | -1.60460200 | -3.02511700 |
| C | -3.10040500 | 1.61561800  | -2.91158500 | C | 7.50079300   | 2.65399600  | 2.17004200  |
| C | -2.76548200 | -3.45715400 | 0.78624400  | C | 7.66437600   | 1.52291600  | 3.01799600  |
| C | -2.60163600 | -3.50066000 | -0.62828800 | C | 7.96416500   | 1.18581200  | -3.15209200 |
| C | -2.76757300 | 3.44007500  | -0.79440300 | C | 8.11258400   | 2.39074800  | -2.48233100 |
| C | -2.59257300 | 3.47140800  | 0.61880900  | C | 7.98981500   | -1.26582600 | 3.14385200  |
| C | -2.27053900 | -1.90351300 | -2.88348000 | C | 8.13830400   | -2.46923300 | 2.47341300  |
| C | -2.10983200 | -0.55772600 | -3.33848900 | C | 8.44339600   | 3.62001000  | 0.15651800  |
| C | -2.25867800 | 1.76337100  | 2.83085200  | C | 8.60631500   | 3.22893400  | 1.44800300  |
| C | -2.10077400 | 0.43798200  | 3.32503400  | C | 8.45336100   | -3.69694500 | -0.16672200 |
| C | -1.80861300 | 2.12139500  | -2.62786300 | C | 8.60890900   | -3.30637200 | -1.45861100 |
| C | -1.65915400 | 3.17211300  | -1.67596800 | C | 8.96172500   | 0.94849400  | 3.30630000  |
| C | -1.78877400 | -2.24781800 | 2.66390800  | C | 9.11816100   | -0.39251100 | 3.39147900  |
| C | -1.63212000 | -3.16958000 | 1.58145700  | C | 8.94629700   | -1.02379800 | -3.31863700 |
| C | -1.29420800 | 3.35228000  | 1.23795500  | C | 9.09527000   | 0.31795100  | -3.40567300 |
| C | -1.13099200 | 2.43803200  | 2.32117100  | H | -10.10835800 | 2.61048300  | -2.45418200 |
| C | -1.30578400 | -3.34998600 | -1.17607500 | H | -9.83479500  | 3.76622200  | -0.31500900 |
| C | -1.14130800 | -2.57148100 | -2.35810100 | H | -10.09696000 | -2.70615700 | 2.48925800  |
| C | -0.80391100 | -0.13662700 | 3.36137300  | H | -9.83146700  | -3.86192000 | 0.34892500  |
| C | -0.64726500 | -1.51457500 | 3.08204700  | H | -9.58330900  | 3.29448900  | 1.86959100  |
| C | -0.81935500 | 0.02068800  | -3.34793300 | H | -9.28291000  | 1.61846700  | 3.59802900  |
| C | -0.66132400 | 1.40113700  | -3.03898500 | H | -9.59752600  | -3.38907600 | -1.83273800 |
| C | -0.32693300 | -3.39015400 | 1.05080700  | H | -9.30779200  | -1.71176300 | -3.56195800 |
| C | -0.16344800 | -3.53629600 | -0.33872500 | H | -9.12031800  | -0.56260600 | 3.45840900  |
| C | -0.36987100 | 3.62350100  | -1.39057600 | H | -9.13642300  | 0.46795300  | -3.43095300 |
| C | -0.13422500 | 3.83325800  | 0.61887000  | H | 9.11987800   | 2.71845000  | -2.24542700 |
| C | 0.16632100  | -2.11615900 | -2.70851900 | H | 9.14502900   | -2.79384400 | 2.23005700  |
| C | 0.32615400  | -0.82932100 | -3.25081200 | H | 9.31075600   | 3.92455000  | -0.42099100 |
| C | 0.17641000  | 1.99638400  | 2.68881600  | H | 9.60089600   | 3.22384300  | 1.88132300  |
| C | 0.34013800  | 0.71344900  | 3.26117900  | H | 9.32384000   | -4.00061300 | 0.40652400  |
| C | 0.64599600  | 1.91074900  | -2.75773000 | H | 9.60094900   | -3.29957900 | -1.89772300 |
| C | 0.80388900  | 3.02028500  | -1.89491200 | H | 9.83047600   | 1.59594900  | 3.37055100  |
| C | 0.66458300  | -2.02620100 | 2.81205800  | H | 10.10570900  | -0.82830900 | 3.51443900  |
| C | 0.82521900  | -3.02502300 | 1.82850700  | H | 9.81817300   | -1.66665200 | -3.38665200 |
| C | 1.16904400  | 3.45743800  | 0.99481900  | H | 10.07998200  | 0.75863800  | -3.53385200 |
| C | 1.32575600  | 2.63448200  | 2.13730500  | O | -0.25005700  | 4.65914400  | -0.48242700 |
| C | 1.15084900  | -3.43187300 | -0.90356300 |   |              |             |             |
